# Supplementary material for: Genomics, molecular and evolutionary perspective of NAC transcription factors
Source: PubMed Central journal article supplement (PMC7147800; doi:10.1371/journal.pone.0231425), 2020-04-10
Supplement: pone.0231425.s002.pdf [file pone.0231425.s002.pdf]

**Supplementary Table 2**

NAC TFs showing the presence of novel functional domain along with NAC domains.

| <b>NAC TFs</b>                 | <b>Species</b>               | <b>Active site</b>                                                             |
|--------------------------------|------------------------------|--------------------------------------------------------------------------------|
| Pavir.Ha00781                  | <i>Panicum virgatum</i>      | <i>Aldehyde dehydrogenases cysteine active site</i>                            |
| Carubv10005139m                | <i>Capsella rubella</i>      | <i>Aldehyde dehydrogenases glutamic acid active site</i>                       |
| 491912                         | <i>Arabidopsis lyrata</i>    | <i>Aldehyde dehydrogenases glutamic acid active site</i>                       |
| GSBRNA2T00058100001            | <i>Brassica napus</i>        | <i>Aldehyde dehydrogenases glutamic acid active site</i>                       |
| GSBRNA2T00078811001            | <i>Brassica napus</i>        | <i>Aldehyde dehydrogenases glutamic acid active site</i>                       |
| XP_013638893.1                 | <i>Brassica oleracea</i>     | <i>Antenna complexes beta subunits signature</i>                               |
| Prupe.2G196600.1.p             | <i>Prunus persica</i>        | <i>ATP synthase alpha and beta subunits signature</i>                          |
| Pavir.J01198                   | <i>Panicum virgatum</i>      | <i>Cysteine proteases inhibitors signature</i>                                 |
| GSMUA_Achr9P20400_001          | <i>Musa acuminata</i>        | <i>Endopeptidase Clp serine active site</i>                                    |
| ACHN289231                     | <i>Actinidia chinensis</i>   | <i>Heavy-metal-associated domain</i>                                           |
| LOC_Os01g47670                 | <i>Oryza sativa</i>          | <i>Inorganic pyrophosphatase signature</i>                                     |
| Thhalv10009374m                | <i>Eutrema salsugineum</i>   | <i>Inorganic pyrophosphatase signature</i>                                     |
| Niben101Scf07168g02012.1       | <i>Nicotiana benthamiana</i> | <i>Lipocalin signature</i>                                                     |
| XP_011088938.1                 | <i>Sesamum indicum</i>       | <i>Pancreatic trypsin inhibitor (Kunitz) family signature</i>                  |
| KHN08560.1                     | <i>Glycine soja</i>          | <i>Putative AMP-binding domain signature</i>                                   |
| MLOC_75795.1                   | <i>Hordeum vulgare</i>       | <i>Zinc carboxypeptidases, zinc-binding region 2 signature</i>                 |
| Vradi01g03390.1                | <i>Vigna radiata</i>         | <i>2Fe-2S ferredoxin-type iron-sulfur binding region signature</i>             |
| FANhyb_rscf00000665.1.g00005.1 | <i>Fragaria ananassa</i>     | <i>2-oxo acid dehydrogenases acyltransferase component lipoyl binding site</i> |
| XP_010916182.1                 | <i>Elaeis guineensi</i>      | <i>4Fe-4S ferredoxin-type iron-sulfur binding domain profile</i>               |
| XP_010916183.1                 | <i>Elaeis guineensi</i>      | <i>4Fe-4S ferredoxin-type iron-sulfur binding domain profile</i>               |
| GSMUA_Achr11P03780_001         | <i>Musa acuminata</i>        | <i>7,8-dihydro-6-hydroxymethylpterin-pyrophosphokinase signature</i>           |
| GSMUA_Achr11P17510_001         | <i>Musa acuminata</i>        | <i>7,8-dihydro-6-hydroxymethylpterin-pyrophosphokinase signature</i>           |
| GSMUA_Achr6P36840_001          | <i>Musa acuminata</i>        | <i>7,8-dihydro-6-hydroxymethylpterin-pyrophosphokinase signature</i>           |
| GSMUA_Achr7P06640_001          | <i>Musa acuminata</i>        | <i>7,8-dihydro-6-hydroxymethylpterin-pyrophosphokinase signature</i>           |

|                          |                            |                                                                      |
|--------------------------|----------------------------|----------------------------------------------------------------------|
| GSMUA_Achr8P11590_001    | <i>Musa acuminata</i>      | <i>7,8-dihydro-6-hydroxymethylpterin-pyrophosphokinase signature</i> |
| NNU_008894-RA            | <i>Nelumbo nucifera</i>    | <i>7,8-dihydro-6-hydroxymethylpterin-pyrophosphokinase signature</i> |
| NNU_012069-RA            | <i>Nelumbo nucifera</i>    | <i>7,8-dihydro-6-hydroxymethylpterin-pyrophosphokinase signature</i> |
| Phvu1.011G005700         | <i>Phaseolus vulgaris</i>  | <i>7,8-dihydro-6-hydroxymethylpterin-pyrophosphokinase signature</i> |
| PDK_30s1016001g009       | <i>Phoenix dactylifera</i> | <i>7,8-dihydro-6-hydroxymethylpterin-pyrophosphokinase signature</i> |
| Spipo1G0086600           | <i>Spirodela polyrhiza</i> | <i>7,8-dihydro-6-hydroxymethylpterin-pyrophosphokinase signature</i> |
| Zosma265g00020           | <i>Zostera marina</i>      | <i>7,8-dihydro-6-hydroxymethylpterin-pyrophosphokinase signature</i> |
| ACHN002691               | <i>Actinidia chinensis</i> | <i>7,8-dihydro-6-hydroxymethylpterin-pyrophosphokinase signature</i> |
| ACHN093311               | <i>Actinidia chinensis</i> | <i>7,8-dihydro-6-hydroxymethylpterin-pyrophosphokinase signature</i> |
| ACHN157011               | <i>Actinidia chinensis</i> | <i>7,8-dihydro-6-hydroxymethylpterin-pyrophosphokinase signature</i> |
| ACHN317511               | <i>Actinidia chinensis</i> | <i>7,8-dihydro-6-hydroxymethylpterin-pyrophosphokinase signature</i> |
| ACO007609.1              | <i>Ananus comosus</i>      | <i>7,8-dihydro-6-hydroxymethylpterin-pyrophosphokinase signature</i> |
| Aqcoe7G078200.1.p        | <i>Aquilegiacoerulea</i>   | <i>7,8-dihydro-6-hydroxymethylpterin-pyrophosphokinase signature</i> |
| Bv5_097990_fpf.t1        | <i>Beta vulgaris</i>       | <i>7,8-dihydro-6-hydroxymethylpterin-pyrophosphokinase signature</i> |
| Brast07G026300.1.p       | <i>Brachypodium stacei</i> | <i>7,8-dihydro-6-hydroxymethylpterin-pyrophosphokinase signature</i> |
| XP_004514529.1           | <i>Cicer arietinum</i>     | <i>7,8-dihydro-6-hydroxymethylpterin-pyrophosphokinase signature</i> |
| XP_010933718.1           | <i>Elaeis guineensi</i>    | <i>7,8-dihydro-6-hydroxymethylpterin-pyrophosphokinase signature</i> |
| Glyma-09G231700.1.p      | <i>Glycine max</i>         | <i>7,8-dihydro-6-hydroxymethylpterin-pyrophosphokinase signature</i> |
| KHN11660.1               | <i>Glycine soja</i>        | <i>7,8-dihydro-6-hydroxymethylpterin-pyrophosphokinase signature</i> |
| Medtr4g036030.1          | <i>Medicago truncatula</i> | <i>7,8-dihydro-6-hydroxymethylpterin-pyrophosphokinase signature</i> |
| XP_010108028.1           | <i>Morus notabilis</i>     | <i>7,8-dihydro-6-hydroxymethylpterin-pyrophosphokinase signature</i> |
| PDK_30s1016001g009       | <i>Phoenix dactylifera</i> | <i>7,8-dihydro-6-hydroxymethylpterin-pyrophosphokinase signature</i> |
| Tp57577_TGAC_v2_mRNA3761 | <i>Trifolium pratense</i>  | <i>7,8-dihydro-6-hydroxymethylpterin-pyrophosphokinase signature</i> |
| Vang05g07280             | <i>Vigna angularis</i>     | <i>7,8-dihydro-6-hydroxymethylpterin-pyrophosphokinase signature</i> |
| C.cajan_20892            | <i>Cajanus cajan</i>       | <i>7,8-dihydro-6-hydroxymethylpterin-pyrophosphokinase signature</i> |
| GSVIVT01001264001        | <i>Vitis vinifera</i>      | <i>7,8-dihydro-6-hydroxymethylpterin-pyrophosphokinase signature</i> |
| Aradu.Y1DM8              | <i>Arachis duranensis</i>  | <i>ABC transporters family signature</i>                             |
| Araip.HYM8C              | <i>Arachis ipaensis</i>    | <i>ABC transporters family signature</i>                             |

|                             |                                |                                                          |
|-----------------------------|--------------------------------|----------------------------------------------------------|
| mrna03833-1-v1-0-hybrid     | <i>Fragaria vesca</i>          | <i>Adenosine and AMP deaminase signature</i>             |
| PSME_00042313-RA            | <i>Pseudotsuga menziesii</i>   | <i>Adenosine and AMP deaminase signature</i>             |
| Zosma69g00740               | <i>Zostera marina</i>          | <i>Adipokinetic hormone family signature</i>             |
| Pavir.8NG107600.1.p         | <i>Panicum virgatum</i>        | <i>Aldehyde dehydrogenases cysteine active site</i>      |
| Pavir.8NG113600.1.p         | <i>Panicum virgatum</i>        | <i>Aldehyde dehydrogenases cysteine active site</i>      |
| RrC2674_p3                  | <i>Raphanus raphanistrum</i>   | <i>Aldehyde dehydrogenases cysteine active site</i>      |
| Rsa1.0_00285.1_g00018.1     | <i>Raphanus sativus</i>        | <i>Aldehyde dehydrogenases cysteine active site</i>      |
| Araha-3365s0007             | <i>Arabidopsis halleri</i>     | <i>Aldehyde dehydrogenases glutamic acid active site</i> |
| AT4G28530                   | <i>Arabidopsis thaliana</i>    | <i>Aldehyde dehydrogenases glutamic acid active site</i> |
| Bra010362                   | <i>Brassica rapa</i>           | <i>Aldehyde dehydrogenases glutamic acid active site</i> |
| Bra011037                   | <i>Brassica rapa</i>           | <i>Aldehyde dehydrogenases glutamic acid active site</i> |
| Cagra-1225s0038             | <i>Capsella grandiflora</i>    | <i>Aldehyde dehydrogenases glutamic acid active site</i> |
| evm.model.supercontig_80.94 | <i>Carica papaya</i>           | <i>Aldehyde dehydrogenases glutamic acid active site</i> |
| Kalax.0013s0167             | <i>Kalanchoe laxiflora</i>     | <i>Aldehyde dehydrogenases glutamic acid active site</i> |
| Kalax.0154s0005             | <i>Kalanchoe laxiflora</i>     | <i>Aldehyde dehydrogenases glutamic acid active site</i> |
| Thhalv10025606m             | <i>Thellungiella halophila</i> | <i>Aldehyde dehydrogenases glutamic acid active site</i> |
| Araha.3365s0007.1.p         | <i>Arabidopsis halleri</i>     | <i>Aldehyde dehydrogenases glutamic acid active site</i> |
| KFK29397.1                  | <i>Arabis alpina</i>           | <i>Aldehyde dehydrogenases glutamic acid active site</i> |
| XP_013603495.1              | <i>Brassica oleracea</i>       | <i>Aldehyde dehydrogenases glutamic acid active site</i> |
| XP_009109087.1              | <i>Brassica rapa</i>           | <i>Aldehyde dehydrogenases glutamic acid active site</i> |
| XP_009129548.1              | <i>Brassica rapa</i>           | <i>Aldehyde dehydrogenases glutamic acid active site</i> |
| Csa10g014090.1              | <i>Camelina sativa</i>         | <i>Aldehyde dehydrogenases glutamic acid active site</i> |
| Csa11g015230.1              | <i>Camelina sativa</i>         | <i>Aldehyde dehydrogenases glutamic acid active site</i> |
| Csa12g021980.1              | <i>Camelina sativa</i>         | <i>Aldehyde dehydrogenases glutamic acid active site</i> |
| Carubv10005139m             | <i>Capsella rubella</i>        | <i>Aldehyde dehydrogenases glutamic acid active site</i> |
| Thhalv10025606m             | <i>Eutrema salsugineum</i>     | <i>Aldehyde dehydrogenases glutamic acid active site</i> |
| Kalax-0013s0167.1.p         | <i>Kalanchoe marnieriana</i>   | <i>Aldehyde dehydrogenases glutamic acid active site</i> |
| Kalax-0154s0005.1.p         | <i>Kalanchoe marnieriana</i>   | <i>Aldehyde dehydrogenases glutamic acid active site</i> |

|                                |                              |                                                                       |
|--------------------------------|------------------------------|-----------------------------------------------------------------------|
| RrC20539_p1                    | <i>Raphanus raphanistrum</i> | <i>Aldehyde dehydrogenases glutamic acid active site</i>              |
| Rsa1.0_13977.1_g00001.1        | <i>Raphanus sativus</i>      | <i>Aldehyde dehydrogenases glutamic acid active site</i>              |
| GSBRNA2T00104607001            | <i>Brassica napus</i>        | <i>Aldehyde dehydrogenases glutamic acid active site</i>              |
| Bv3_050780_usim.t1             | <i>Beta vulgaris</i>         | <i>Aldo/keto reductase family putative active site signature</i>      |
| FANhyb_rscf00000207.1.g00009.1 | <i>Fragaria ananassa</i>     | <i>Aldo/keto reductase family putative active site signature</i>      |
| Zmw_sc01138.1.g00130.1         | <i>Zoysia matrella</i>       | <i>Aldo/keto reductase family putative active site signature</i>      |
| Zpz_sc00095.1.g00090.1.am.mk   | <i>Zoysia pacifica</i>       | <i>Aldo/keto reductase family putative active site signature</i>      |
| LOC_Os12g22940                 | <i>Oryza sativa</i>          | <i>Alkaline phosphatase active site</i>                               |
| OMERI12G11070.1                | <i>Oryza meridionalis</i>    | <i>Alkaline phosphatase active site</i>                               |
| ORUFI12G10910.1                | <i>Oryza rufipogon</i>       | <i>Alkaline phosphatase active site</i>                               |
| BGIOGA037293.1                 | <i>Oryza sativa Indica</i>   | <i>Alkaline phosphatase active site</i>                               |
| LOC_Os12g22940.1               | <i>Oryza sativa japonica</i> | <i>Alkaline phosphatase active site</i>                               |
| Carubv10012206m                | <i>Capsella rubella</i>      | <i>Aminoacyl-transfer RNA synthetases class-I signature</i>           |
| Oropetium_20150105_22096       | <i>Oropetium thomaeum</i>    | <i>Aminotransferases class-II pyridoxal-phosphate attachment site</i> |
| ObartAA03S_FGP10288            | <i>Oryza barthii</i>         | <i>Aminotransferases class-II pyridoxal-phosphate attachment site</i> |
| ORGLA12G0169600.1              | <i>Oryza glaberrima</i>      | <i>Aminotransferases class-II pyridoxal-phosphate attachment site</i> |
| OpuncBB_FGP10000               | <i>Oryza punctata</i>        | <i>Aminotransferases class-II pyridoxal-phosphate attachment site</i> |
| LOC_Os12g43530                 | <i>Oryza sativa</i>          | <i>Aminotransferases class-II pyridoxal-phosphate attachment site</i> |
| Oropetium_20150105_22096A      | <i>Oropetium thomaeum</i>    | <i>Aminotransferases class-II pyridoxal-phosphate attachment site</i> |
| ORGLA12G0169600.1              | <i>Oryza glaberrima</i>      | <i>Aminotransferases class-II pyridoxal-phosphate attachment site</i> |
| OGLUM12G21360.1                | <i>Oryza glumaepatula</i>    | <i>Aminotransferases class-II pyridoxal-phosphate attachment site</i> |
| KN539001.1                     | <i>Oryza longistaminata</i>  | <i>Aminotransferases class-II pyridoxal-phosphate attachment site</i> |
| OMERI12G14510                  | <i>Oryza meridionalis</i>    | <i>Aminotransferases class-II pyridoxal-phosphate attachment site</i> |
| ONIVA12G18630.1                | <i>Oryza nivara</i>          | <i>Aminotransferases class-II pyridoxal-phosphate attachment site</i> |
| OPUNC12G17870.1                | <i>Oryza punctata</i>        | <i>Aminotransferases class-II pyridoxal-phosphate attachment site</i> |
| ORUFI12G21970.1                | <i>Oryza rufipogon</i>       | <i>Aminotransferases class-II pyridoxal-phosphate attachment site</i> |
| BGIOGA035784.1                 | <i>Oryza sativa Indica</i>   | <i>Aminotransferases class-II pyridoxal-phosphate attachment site</i> |
| LOC_Os12g43530.1               | <i>Oryza sativa japonica</i> | <i>Aminotransferases class-II pyridoxal-phosphate attachment site</i> |

|                                |                                  |                                                            |
|--------------------------------|----------------------------------|------------------------------------------------------------|
| XP_009146239.1                 | <i>Brassica rapa</i>             | <i>Antenna complexes beta subunits signature</i>           |
| Zmw_sc05821.1.g00010.1         | <i>Zoysia matrella</i>           | <i>ArgE / dapE / ACY1 / CPG2 / yscS family signature 1</i> |
| Zpz_sc00055.1.g00240.1.am.mkhc | <i>Zoysia pacifica</i>           | <i>ArgE / dapE / ACY1 / CPG2 / yscS family signature 1</i> |
| Medtr4g134460.1                | <i>Medicago truncatula</i>       | <i>Aspartate and glutamate racemases signature 1</i>       |
| XP_010545324.1                 | <i>Tarenaya hassleriana</i>      | <i>Aspartate and glutamate racemases signature 1</i>       |
| XP_010545325.1                 | <i>Tarenaya hassleriana</i>      | <i>Aspartate and glutamate racemases signature 1</i>       |
| Brast02G382000.1.p             | <i>Brachypodium stacei</i>       | <i>Aspartokinase signature</i>                             |
| Brast02G383700.1.p             | <i>Brachypodium stacei</i>       | <i>Aspartokinase signature</i>                             |
| EMT33859                       | <i>Aegilops tauschii</i>         | <i>ATP Binding site and proton acceptor</i>                |
| Gorai.008G130300.1             | <i>Gossypium raimondii</i>       | <i>ATP synthase alpha and beta subunits signature</i>      |
| PH01000820G0540                | <i>Phyllostachys heterocycla</i> | <i>ATP synthase alpha and beta subunits signature</i>      |
| Pta007882                      | <i>Pinus taeda</i>               | <i>ATP synthase alpha and beta subunits signature</i>      |
| ppa020746m                     | <i>Prunus persica</i>            | <i>ATP synthase alpha and beta subunits signature</i>      |
| Solyc08g008660.2.1             | <i>Solanum lycopersicum</i>      | <i>ATP synthase alpha and beta subunits signature</i>      |
| PGSC0003DMP400010296           | <i>Solanum tuberosum</i>         | <i>ATP synthase alpha and beta subunits signature</i>      |
| PGSC0003DMP400010297           | <i>Solanum tuberosum</i>         | <i>ATP synthase alpha and beta subunits signature</i>      |
| CA11g08290                     | <i>Capsicum annuum</i>           | <i>ATP synthase alpha and beta subunits signature</i>      |
| Cotton_A_26426_BGI-A2_v1.0     | <i>Gossypium arboreum</i>        | <i>ATP synthase alpha and beta subunits signature</i>      |
| XP_010100656.1                 | <i>Morus notabilis</i>           | <i>ATP synthase alpha and beta subunits signature</i>      |
| PH01000820G0540                | <i>Phyllostachys heterocycla</i> | <i>ATP synthase alpha and beta subunits signature</i>      |
| XP_008233055.1                 | <i>Prunus mume</i>               | <i>ATP synthase alpha and beta subunits signature</i>      |
| Sme2.5_02517.1_g00007.1        | <i>Solanum melongena</i>         | <i>ATP synthase alpha and beta subunits signature</i>      |
| Sopen08g004490.1               | <i>Solanum pennellii</i>         | <i>ATP synthase alpha and beta subunits signature</i>      |
| Zmw_sc04326.1.g00020.1         | <i>Zoysia matrella</i>           | <i>ATP synthase alpha and beta subunits signature</i>      |
| Ciclev10019282m                | <i>Citrus clementina</i>         | <i>ATP synthase alpha and beta subunits signature</i>      |
| Gh_A12G1049                    | <i>Gossypium hirsutum</i>        | <i>ATP synthase alpha and beta subunits signature</i>      |
| Sopim08g008660.0.1             | <i>Solanum pimpinellifolium</i>  | <i>ATP synthase alpha and beta subunits signature</i>      |
| Pbr032225.1                    | <i>Pyrus bretschneideri</i>      | <i>ATP-dependent DNA ligase AMP-binding site</i>           |

|                              |                              |                                                             |
|------------------------------|------------------------------|-------------------------------------------------------------|
| Pbr032225.1                  | <i>Pyrus bretschneideri</i>  | <i>ATP-dependent DNA ligase AMP-binding site</i>            |
| Spipo1G0084400               | <i>Spirodela polyrhiza</i>   | <i>Bacterial regulatory proteins, araC family signature</i> |
| MLOC_19933.1                 | <i>Hordeum vulgare</i>       | <i>Beta-ketoacyl synthases active site</i>                  |
| MLOC_19933.1                 | <i>Hordeum vulgare</i>       | <i>Beta-ketoacyl synthases active site</i>                  |
| Thecc1EG018508t              | <i>Theobroma cacao</i>       | <i>C-5 cytosine-specific DNA methylases active site</i>     |
| Aqcoe1G058100.1.p            | <i>Aquilegiacoerulea</i>     | <i>Cadherin domain signature</i>                            |
| KFK30695.1                   | <i>Arabis alpina</i>         | <i>Carbamoyl-phosphate synthase subdomain signature 2</i>   |
| ObartAA03S_FGP25558          | <i>Oryza barthii</i>         | <i>Cysteine proteases inhibitors signature</i>              |
| ORGLA06G0236900.1            | <i>Oryza glaberrima</i>      | <i>Cysteine proteases inhibitors signature</i>              |
| OpuncBB_FGP25111             | <i>Oryza punctata</i>        | <i>Cysteine proteases inhibitors signature</i>              |
| LOC_Os06g51070               | <i>Oryza sativa</i>          | <i>Cysteine proteases inhibitors signature</i>              |
| 462845378                    | <i>Eragrostis tef</i>        | <i>Cysteine proteases inhibitors signature</i>              |
| ORGLA06G0236900.1            | <i>Oryza glaberrima</i>      | <i>Cysteine proteases inhibitors signature</i>              |
| OGLUM06G29360.1              | <i>Oryza glumaepatula</i>    | <i>Cysteine proteases inhibitors signature</i>              |
| OMERI06G27920.1              | <i>Oryza meridionalis</i>    | <i>Cysteine proteases inhibitors signature</i>              |
| ONIVA06G30950.1              | <i>Oryza nivara</i>          | <i>Cysteine proteases inhibitors signature</i>              |
| OPUNC06G25510.1              | <i>Oryza punctata</i>        | <i>Cysteine proteases inhibitors signature</i>              |
| ORUFI06G29930.1              | <i>Oryza rufipogon</i>       | <i>Cysteine proteases inhibitors signature</i>              |
| BGIOSGA020507.1              | <i>Oryza sativa Indica</i>   | <i>Cysteine proteases inhibitors signature</i>              |
| LOC_Os06g51070.1             | <i>Oryza sativa japonica</i> | <i>Cysteine proteases inhibitors signature</i>              |
| Pavir.4NG342400.1.p          | <i>Panicum virgatum</i>      | <i>Cysteine proteases inhibitors signature</i>              |
| Pavir.7KG085500.1.p          | <i>Panicum virgatum</i>      | <i>Cysteine proteases inhibitors signature</i>              |
| Zmw_sc02823.1.g00180.1       | <i>Zoysia matrella</i>       | <i>Cysteine proteases inhibitors signature</i>              |
| Zpz_sc01253.1.g00030.1.sm.mk | <i>Zoysia pacifica</i>       | <i>Cysteine proteases inhibitors signature</i>              |
| Zjn_sc00068.1.g03510.1.sm.mk | <i>Zoysia japonica</i>       | <i>Cysteine proteases inhibitors signature</i>              |
| OGLUM01G06950.1              | <i>Oryza glumaepatula</i>    | <i>Cytochrome P450 cysteine heme-iron ligand signature</i>  |
| KN539290.1                   | <i>Oryza longistaminata</i>  | <i>Cytochrome P450 cysteine heme-iron ligand signature</i>  |
| KN539290.1                   | <i>Oryza longistaminata</i>  | <i>Cytochrome P450 cysteine heme-iron ligand signature</i>  |

|                              |                              |                                                              |
|------------------------------|------------------------------|--------------------------------------------------------------|
| OMERI07G10400                | <i>Oryza meridionalis</i>    | <i>Cytochrome P450 cysteine heme-iron ligand signature</i>   |
| Zmw_sc00276.1.g00230.1       | <i>Zoysia matrella</i>       | <i>Cytochrome P450 cysteine heme-iron ligand signature</i>   |
| Zmw_sc02343.1.g00060.1       | <i>Zoysia matrella</i>       | <i>Cytochrome P450 cysteine heme-iron ligand signature</i>   |
| Zpz_sc03671.1.g00030.1.am.mk | <i>Zoysia pacifica</i>       | <i>Cytochrome P450 cysteine heme-iron ligand signature</i>   |
| Sobic.003G105800.1.p         | <i>Sorghum bicolor</i>       | <i>Endopeptidase Clp serine active site</i>                  |
| GRMZM2G123246_P01            | <i>Vzea mays</i>             | <i>Endopeptidase Clp serine active site</i>                  |
| EMT14807                     | <i>Aegilops tauschii</i>     | <i>Eukaryotic and viral aspartyl proteases active site</i>   |
| Tae025010                    | <i>Triticum aestivum</i>     | <i>Eukaryotic and viral aspartyl proteases active site</i>   |
| Tae030617                    | <i>Triticum aestivum</i>     | <i>Eukaryotic and viral aspartyl proteases active site</i>   |
| Tae045052                    | <i>Triticum aestivum</i>     | <i>Eukaryotic and viral aspartyl proteases active site</i>   |
| EMS63374                     | <i>Triticum urartu</i>       | <i>Eukaryotic and viral aspartyl proteases active site</i>   |
| Itr_sc004419.1.g00003.1      | <i>Ipomea trifida</i>        | <i>Eukaryotic and viral aspartyl proteases active site</i>   |
| Traes_7DL_BDD45DB24.2        | <i>Triticum aestivum</i>     | <i>Eukaryotic and viral aspartyl proteases active site</i>   |
| Zjn_sc00092.1.g00060.1.am.mk | <i>Zoysia japonica</i>       | <i>Eukaryotic and viral aspartyl proteases active site</i>   |
| Zmw_sc03455.1.g00010.1       | <i>Zoysia matrella</i>       | <i>Eukaryotic and viral aspartyl proteases active site</i>   |
| Zpz_sc03692.1.g00060.1.sm.mk | <i>Zoysia pacifica</i>       | <i>Eukaryotic and viral aspartyl proteases active site</i>   |
| Niben101Scf07508g02004.1     | <i>Nicotiana benthamiana</i> | <i>FGGY family of carbohydrate kinases signature 2</i>       |
| MA_18939g0010                | <i>Picea abies</i>           | <i>Fumarate lyases signature</i>                             |
| Rsa1.0_01603.1.g00007.1      | <i>Raphanus sativus</i>      | <i>Fumarate lyases signature</i>                             |
| GSMUA_Achr10P10790_001       | <i>Musa acuminata</i>        | <i>GHMP kinases putative ATP-binding domain</i>              |
| Peinf101Scf00337g03028.1     | <i>Petunia inflata</i>       | <i>Glucoamylase active site region signature</i>             |
| Cucsa.083540.1               | <i>Cucumis sativus</i>       | <i>Glyceraldehyde 3-phosphate dehydrogenase active</i>       |
| ONIVA05G06750.1              | <i>Oryza nivara</i>          | <i>Glycoprotease family signature</i>                        |
| Cc08_g16900                  | <i>Coffea canephora</i>      | <i>Glycosyl hydrolases family 5 signature</i>                |
| 30147.m014211                | <i>Ricinus communis</i>      | <i>Glycosyl hydrolases family 9 active sites signature 2</i> |
| Kalax-0686s0005.1.p          | <i>Kalanchoe marnieriana</i> | <i>Hemopexin domain signature</i>                            |
| Kalax-0609s0006.1.p          | <i>Kalanchoe marnieriana</i> | <i>Hemopexin domain signature</i>                            |
| Scf00060.g6196.t1            | <i>Utricularia gibba</i>     | <i>Histone H4 signature</i>                                  |

|                        |                                 |                                                                                |
|------------------------|---------------------------------|--------------------------------------------------------------------------------|
| XP_016648489.1         | <i>Prunus mume</i>              | <i>Histone H4 signature</i>                                                    |
| Prupe.4G138500.1.p     | <i>Prunus persica</i>           | <i>Histone H4 signature</i>                                                    |
| Zmw_sc06792.1.g00040.1 | <i>Zoysia matrella</i>          | <i>Histone H4 signature</i>                                                    |
| ObartAA03S_FGP17273    | <i>Oryza barthii</i>            | <i>HMG-I and HMG-Y DNA-binding domain (A+T-hook)</i>                           |
| LOC_Os03g59730         | <i>Oryza sativa</i>             | <i>HMG-I and HMG-Y DNA-binding domain (A+T-hook)</i>                           |
| Bradi1g04229.1.p       | <i>Brachypodium distachyon</i>  | <i>HMG-I and HMG-Y DNA-binding domain (A+T-hook)</i>                           |
| Brast02G355100.1.p     | <i>Brachypodium stacei</i>      | <i>HMG-I and HMG-Y DNA-binding domain (A+T-hook)</i>                           |
| OGLUM03G38320.1        | <i>Oryza glumaepatula</i>       | <i>HMG-I and HMG-Y DNA-binding domain (A+T-hook)</i>                           |
| OMERI03G35410.1        | <i>Oryza meridionalis</i>       | <i>HMG-I and HMG-Y DNA-binding domain (A+T-hook)</i>                           |
| ORUFI03G40160.1        | <i>Oryza rufipogon</i>          | <i>HMG-I and HMG-Y DNA-binding domain (A+T-hook)</i>                           |
| BGIOGA009581.1         | <i>Oryza sativa Indica</i>      | <i>HMG-I and HMG-Y DNA-binding domain (A+T-hook)</i>                           |
| LOC_Os03g59730.1       | <i>Oryza sativa japonica</i>    | <i>HMG-I and HMG-Y DNA-binding domain (A+T-hook)</i>                           |
| Pbr020079.1            | <i>Pyrus bretschneideri</i>     | <i>Immunoglobulins and major histocompatibility complex proteins signature</i> |
| EcC046909.20           | <i>Eucalyptus camaldulensis</i> | <i>Immunoglobulins and major histocompatibility complex proteins signature</i> |
| EcS504758.10           | <i>Eucalyptus camaldulensis</i> | <i>Immunoglobulins and major histocompatibility complex proteins signature</i> |
| Pbr020079.1            | <i>Pyrus bretschneideri</i>     | <i>Immunoglobulins and major histocompatibility complex proteins signature</i> |
| ORGLA01G0211000.1      | <i>Oryza glaberrima</i>         | <i>Inorganic pyrophosphatase signature</i>                                     |
| Pbr026815.1            | <i>Pyrus bretschneideri</i>     | <i>Inorganic pyrophosphatase signature</i>                                     |
| Thhalv10009374m        | <i>Thellungiella halophila</i>  | <i>Inorganic pyrophosphatase signature</i>                                     |
| XP_010108843.1         | <i>Morus notabilis</i>          | <i>Inorganic pyrophosphatase signature</i>                                     |
| ORGLA01G0211000.1      | <i>Oryza glaberrima</i>         | <i>Inorganic pyrophosphatase signature</i>                                     |
| OGLUM01G29620.1        | <i>Oryza glumaepatula</i>       | <i>Inorganic pyrophosphatase signature</i>                                     |
| OMERI01G23440.1        | <i>Oryza meridionalis</i>       | <i>Inorganic pyrophosphatase signature</i>                                     |
| ONIVA01G29020.1        | <i>Oryza nivara</i>             | <i>Inorganic pyrophosphatase signature</i>                                     |
| ORUFI01G28690.1        | <i>Oryza rufipogon</i>          | <i>Inorganic pyrophosphatase signature</i>                                     |



|                          |                              |                                                           |
|--------------------------|------------------------------|-----------------------------------------------------------|
| LOC_Os01g47670.1         | <i>Oryza sativa japonica</i> | <i>Inorganic pyrophosphatase signature</i>                |
| Pbr026815.1              | <i>Pyrus bretschneideri</i>  | <i>Inorganic pyrophosphatase signature</i>                |
| GSVIVT01026495001        | <i>Vitis vinifera</i>        | <i>Iron-containing alcohol dehydrogenases signature 1</i> |
| OB07G24770.1             | <i>Oryza brachyantha</i>     | <i>Legume lectins beta-chain signature</i>                |
| ORGLA03G0364100.1        | <i>Oryza glaberrima</i>      | <i>Legume lectins beta-chain signature</i>                |
| OGLUM03G39450.1          | <i>Oryza glumaepatula</i>    | <i>Legume lectins beta-chain signature</i>                |
| OGLUM03G39510.1          | <i>Oryza glumaepatula</i>    | <i>Legume lectins beta-chain signature</i>                |
| KN538833.1               | <i>Oryza longistaminata</i>  | <i>Legume lectins beta-chain signature</i>                |
| OMERI03G36390.1          | <i>Oryza meridionalis</i>    | <i>Legume lectins beta-chain signature</i>                |
| OMERI03G36430.1          | <i>Oryza meridionalis</i>    | <i>Legume lectins beta-chain signature</i>                |
| ONIVA03G41430.1          | <i>Oryza nivara</i>          | <i>Legume lectins beta-chain signature</i>                |
| ONIVA03G41480.1          | <i>Oryza nivara</i>          | <i>Legume lectins beta-chain signature</i>                |
| OPUNC03G36710.1          | <i>Oryza punctata</i>        | <i>Legume lectins beta-chain signature</i>                |
| OPUNC03G36760.1          | <i>Oryza punctata</i>        | <i>Legume lectins beta-chain signature</i>                |
| BGIOGA013858.1           | <i>Oryza sativa Indica</i>   | <i>Legume lectins beta-chain signature</i>                |
| BGIOGA013866.1           | <i>Oryza sativa Indica</i>   | <i>Legume lectins beta-chain signature</i>                |
| LOC_Os03g61249.1         | <i>Oryza sativa japonica</i> | <i>Legume lectins beta-chain signature</i>                |
| LOC_Os03g61319.1         | <i>Oryza sativa japonica</i> | <i>Legume lectins beta-chain signature</i>                |
| Nta011914                | <i>Nicotiana tabacum</i>     | <i>Lipocalin signature</i>                                |
| Niben101Ctg05879g00002.1 | <i>Nicotiana benthamiana</i> | <i>Lipocalin signature</i>                                |
| Niben101Scf01337g00001.1 | <i>Nicotiana benthamiana</i> | <i>Lipocalin signature</i>                                |
| Niben101Scf08665g00007.1 | <i>Nicotiana benthamiana</i> | <i>Lipocalin signature</i>                                |
| Niben101Scf13438g00001.1 | <i>Nicotiana benthamiana</i> | <i>Lipocalin signature</i>                                |
| Niben101Scf15279g00002.1 | <i>Nicotiana benthamiana</i> | <i>Lipocalin signature</i>                                |
| XP_009762991.1           | <i>Nicotiana sylvestris</i>  | <i>Lipocalin signature</i>                                |
| XP_009763090.1           | <i>Nicotiana sylvestris</i>  | <i>Lipocalin signature</i>                                |
| XP_009782335.1           | <i>Nicotiana sylvestris</i>  | <i>Lipocalin signature</i>                                |
| XP_009792222.1           | <i>Nicotiana sylvestris</i>  | <i>Lipocalin signature</i>                                |

|                                |                                  |                                                                       |
|--------------------------------|----------------------------------|-----------------------------------------------------------------------|
| XP_009794230.1                 | <i>Nicotiana glauca</i>          | <i>Lipocalin signature</i>                                            |
| XP_016449500.1                 | <i>Nicotiana tabacum</i>         | <i>Lipocalin signature</i>                                            |
| XP_016469037.1                 | <i>Nicotiana tabacum</i>         | <i>Lipocalin signature</i>                                            |
| XP_016474545.1                 | <i>Nicotiana tabacum</i>         | <i>Lipocalin signature</i>                                            |
| XP_016477162.1                 | <i>Nicotiana tabacum</i>         | <i>Lipocalin signature</i>                                            |
| XP_016490755.1                 | <i>Nicotiana tabacum</i>         | <i>Lipocalin signature</i>                                            |
| XP_016504577.1                 | <i>Nicotiana tabacum</i>         | <i>Lipocalin signature</i>                                            |
| XP_016510726.1                 | <i>Nicotiana tabacum</i>         | <i>Lipocalin signature</i>                                            |
| XP_009598748.1                 | <i>Nicotiana tomentosiformis</i> | <i>Lipocalin signature</i>                                            |
| XP_009601217.1                 | <i>Nicotiana tomentosiformis</i> | <i>Lipocalin signature</i>                                            |
| XP_009602879.1                 | <i>Nicotiana tomentosiformis</i> | <i>Lipocalin signature</i>                                            |
| XP_009628837.1                 | <i>Nicotiana tomentosiformis</i> | <i>Lipocalin signature</i>                                            |
| KFK42489.1                     | <i>Arabis alpina</i>             | <i>Mannitol dehydrogenases signature</i>                              |
| OB09G21580.1                   | <i>Oryza brachyanta</i>          | <i>N-6 Adenine-specific DNA methylases signature</i>                  |
| Sobic.003G110900.1.p           | <i>Sorghum bicolor</i>           | <i>N-6 Adenine-specific DNA methylases signature</i>                  |
| Zosma53g00110                  | <i>Zostera marina</i>            | <i>N-6 Adenine-specific DNA methylases signature</i>                  |
| Aqcoe2G375500.1.p              | <i>Aquilegiacoerulea</i>         | <i>N-6 Adenine-specific DNA methylases signature</i>                  |
| scaffold07459-snap-gene-0.9    | <i>Castanea mollissima</i>       | <i>N-6 Adenine-specific DNA methylases signature</i>                  |
| OB04G27030.1                   | <i>Oryza brachyantha</i>         | <i>N-6 Adenine-specific DNA methylases signature</i>                  |
| OB09G21580.1                   | <i>Oryza brachyantha</i>         | <i>N-6 Adenine-specific DNA methylases signature</i>                  |
| Csa16g023250.1                 | <i>Camelina sativa</i>           | <i>Neutral zinc metalloproteinases, zinc-binding region signature</i> |
| Ote100091280041                | <i>Ocimum tenuiflorum</i>        | <i>Neutral zinc metalloproteinases, zinc-binding region signature</i> |
| Neem_8133_f_4                  | <i>Azadirachta indica</i>        | <i>Nt-dnaJ domain signature</i>                                       |
| FANhyb_rscf00000018.1.g00013.1 | <i>Fragaria ananassa</i>         | <i>Nt-dnaJ domain signature</i>                                       |
| EPS67213.1                     | <i>Genlisea aurea</i>            | <i>Peroxidases active site signature</i>                              |
| Ciclev10008619m                | <i>Citrus clementina</i>         | <i>pfkB family of carbohydrate kinases signature 1</i>                |
| Pavir.J21162                   | <i>Panicum virgatum</i>          | <i>pfkB family of carbohydrate kinases signature 2</i>                |
| Thhalv10006408m                | <i>Thellungiella halophila</i>   | <i>pfkB family of carbohydrate kinases signature 2</i>                |

|                                 |                              |                                                                |
|---------------------------------|------------------------------|----------------------------------------------------------------|
| Thhalv10006408m                 | <i>Eutrema salsugineum</i>   | <i>pfkB</i> family of carbohydrate kinases signature 2         |
| Zpz_sc00266.1.g00320.1.am.mk    | <i>Zoysia pacifica</i>       | Phospholipase A2 histidine active site                         |
| GSMUA_Achr11P08970_001          | <i>Musa acuminata</i>        | Phosphopantetheine attachment site                             |
| ObartAA03S_FGP27339             | <i>Oryza barthii</i>         | Phosphopantetheine attachment site                             |
| ORGLA07G0243600.1               | <i>Oryza glaberrima</i>      | Phosphopantetheine attachment site                             |
| OpuncBB_FGP26901                | <i>Oryza punctata</i>        | Phosphopantetheine attachment site                             |
| LOC_Os07g37920                  | <i>Oryza sativa</i>          | Phosphopantetheine attachment site                             |
| Sobic.002G342100.1.p            | <i>Sorghum bicolor</i>       | Phosphopantetheine attachment site                             |
| Sobic.002G342100.1.p            | <i>Sorghum bicolor</i>       | Phosphopantetheine attachment site                             |
| GRMZM2G179885_P01               | <i>Zea mays</i>              | Phosphopantetheine attachment site                             |
| scaffold07067-augustus-gene-0.6 | <i>Castanea mollissima</i>   | Phosphopantetheine attachment site                             |
| Glyma-13G174700.1.p             | <i>Glycine max</i>           | Phosphopantetheine attachment site                             |
| KHN09961.1                      | <i>Glycine soja</i>          | Phosphopantetheine attachment site                             |
| LPERR07G16320.1                 | <i>Leersia perrieri</i>      | Phosphopantetheine attachment site                             |
| ORGLA07G0243600.1               | <i>Oryza glaberrima</i>      | Phosphopantetheine attachment site                             |
| OGLUM07G18780.1                 | <i>Oryza glumaepatula</i>    | Phosphopantetheine attachment site                             |
| KN538693.1                      | <i>Oryza longistaminata</i>  | Phosphopantetheine attachment site                             |
| OMERI07G15720.1                 | <i>Oryza meridionalis</i>    | Phosphopantetheine attachment site                             |
| ONIVA07G17340.1                 | <i>Oryza nivara</i>          | Phosphopantetheine attachment site                             |
| OPUNC07G17890.1                 | <i>Oryza punctata</i>        | Phosphopantetheine attachment site                             |
| ORUFI07G19770.1                 | <i>Oryza rufipogon</i>       | Phosphopantetheine attachment site                             |
| BGIOSGA024071.1                 | <i>Oryza sativa Indica</i>   | Phosphopantetheine attachment site                             |
| LOC_Os07g37920.1                | <i>Oryza sativa japonica</i> | Phosphopantetheine attachment site                             |
| KFK41460.1                      | <i>Arabis alpina</i>         | Polygalacturonase active site                                  |
| Rsa1.0_00061.1_g00015.1         | <i>Raphanus sativus</i>      | Polygalacturonase active site                                  |
| Sobic.005G041000.1.p            | <i>Sorghum bicolor</i>       | Polyprenyl synthases signature 1                               |
| .XP_010536267.1                 | <i>Tarenaya hassleriana</i>  | PPM-type phosphatase domain signature                          |
| Solyc04g079940.2.1              | <i>Solanum lycopersicum</i>  | Prokaryotic membrane lipoprotein lipid attachment site profile |

|                              |                                  |                                                                       |
|------------------------------|----------------------------------|-----------------------------------------------------------------------|
| Scf00187.g11893.t1           | <i>Utricularia gibba</i>         | <i>Prokaryotic membrane lipoprotein lipid attachment site profile</i> |
| Niben101Scf01153g00009.1     | <i>Nicotiana benthamiana</i>     | <i>Prokaryotic membrane lipoprotein lipid attachment site profile</i> |
| Niben101Scf01153g00009.1     | <i>Nicotiana benthamiana</i>     | <i>Prokaryotic membrane lipoprotein lipid attachment site profile</i> |
| XP_009789698.1               | <i>Nicotiana glauca</i>          | <i>Prokaryotic membrane lipoprotein lipid attachment site profile</i> |
| XP_009789699.1               | <i>Nicotiana glauca</i>          | <i>Prokaryotic membrane lipoprotein lipid attachment site profile</i> |
| XP_016453035.1               | <i>Nicotiana glauca</i>          | <i>Prokaryotic membrane lipoprotein lipid attachment site profile</i> |
| XP_016471015.1               | <i>Nicotiana glauca</i>          | <i>Prokaryotic membrane lipoprotein lipid attachment site profile</i> |
| XP_016487616.1               | <i>Nicotiana glauca</i>          | <i>Prokaryotic membrane lipoprotein lipid attachment site profile</i> |
| XP_016487617.1               | <i>Nicotiana glauca</i>          | <i>Prokaryotic membrane lipoprotein lipid attachment site profile</i> |
| XP_009603640.1               | <i>Nicotiana glauca</i>          | <i>Prokaryotic membrane lipoprotein lipid attachment site profile</i> |
| Sopim04g079940.0.1           | <i>Solanum pimpinellifolium</i>  | <i>Prokaryotic membrane lipoprotein lipid attachment site profile</i> |
| Glyma-13G243200.1.p          | <i>Glycine max</i>               | <i>Putative AMP-binding domain signature</i>                          |
| Si039061m                    | <i>Setaria italica</i>           | <i>Regulator of chromosome condensation (RCC1) signature 2</i>        |
| Seita.9G169600.1.p           | <i>Setaria italica</i>           | <i>Regulator of chromosome condensation (RCC1) signature 2</i>        |
| GRMZM2G156977_P01            | <i>Zea mays</i>                  | <i>Ribosomal protein L24e signature</i>                               |
| Cotton_A_00183_BGI-A2_v1.0   | <i>Gossypium arboreum</i>        | <i>Ribosomal protein L31 signature</i>                                |
| Gh_A01G0250                  | <i>Gossypium hirsutum</i>        | <i>Ribosomal protein L31 signature</i>                                |
| KN539025.1                   | <i>Oryza longistaminata</i>      | <i>Ribosomal protein L36 signature</i>                                |
| RrC831_p3                    | <i>Raphanus raphanistrum</i>     | <i>Ribosomal protein S10 signature</i>                                |
| Cotton_A_09649_BGI-A2_v1.0   | <i>Gossypium arboreum</i>        | <i>Ribosomal protein S19e signature</i>                               |
| Zjn_sc00034.1.g02530.1.am.mk | <i>Zoysia japonica</i>           | <i>Ribosomal protein S8 signature</i>                                 |
| Spipo0G0093000               | <i>Spirodela polyrhiza</i>       | <i>Ribosome-binding factor A signature</i>                            |
| PH01000491G0390              | <i>Phyllostachys heterocycla</i> | <i>Rubredoxin signature</i>                                           |
| PH01000491G0390              | <i>Phyllostachys heterocycla</i> | <i>Rubredoxin signature</i>                                           |
| Bradi3g12470.1               | <i>Brachypodium distachyon</i>   | <i>Serine proteases, subtilase family, aspartic acid active site</i>  |
| Pahal.F00337                 | <i>Panicum hallii</i>            | <i>Serine proteases, subtilase family, aspartic acid active site</i>  |
| Pavir.Fa00048                | <i>Panicum virgatum</i>          | <i>Serine proteases, subtilase family, aspartic acid active site</i>  |
| Si013361m                    | <i>Setaria italica</i>           | <i>Serine proteases, subtilase family, aspartic acid active site</i>  |

|                                  |                                  |                                                                      |
|----------------------------------|----------------------------------|----------------------------------------------------------------------|
| Si013378m                        | <i>Setaria italica</i>           | <i>Serine proteases, subtilase family, aspartic acid active site</i> |
| Si013524m                        | <i>Setaria italica</i>           | <i>Serine proteases, subtilase family, aspartic acid active site</i> |
| Sevir.6G256500                   | <i>Setaria viridis</i>           | <i>Serine proteases, subtilase family, aspartic acid active site</i> |
| GRMZM2G125777_P01                | <i>Zea mays</i>                  | <i>Serine proteases, subtilase family, aspartic acid active site</i> |
| Bradi3g12470.1.p                 | <i>Brachypodium distachyon</i>   | <i>Serine proteases, subtilase family, aspartic acid active site</i> |
| Brast03G309200.1.p               | <i>Brachypodium stacei</i>       | <i>Serine proteases, subtilase family, aspartic acid active site</i> |
| Do003945.1                       | <i>Dichantheium oligosanthes</i> | <i>Serine proteases, subtilase family, aspartic acid active site</i> |
| Itr_sc000194.1_g00003.1          | <i>Ipomea trifida</i>            | <i>Serine proteases, subtilase family, aspartic acid active site</i> |
| Pahal.F00337.1                   | <i>Panicum hallii</i>            | <i>Serine proteases, subtilase family, aspartic acid active site</i> |
| Pavir.6KG413300.1.p              | <i>Panicum virgatum</i>          | <i>Serine proteases, subtilase family, aspartic acid active site</i> |
| Pavir.6NG362800.1.p              | <i>Panicum virgatum</i>          | <i>Serine proteases, subtilase family, aspartic acid active site</i> |
| Seita.6G251900.1.p               | <i>Setaria italica</i>           | <i>Serine proteases, subtilase family, aspartic acid active site</i> |
| Sme2.5_05012.1_g00010.1          | <i>Solanum melongena</i>         | <i>Serine proteases, subtilase family, aspartic acid active site</i> |
| XP_010543143.1                   | <i>Tarenaya hassleriana</i>      | <i>Serine proteases, subtilase family, aspartic acid active site</i> |
| XP_010543151.1                   | <i>Tarenaya hassleriana</i>      | <i>Serine proteases, subtilase family, aspartic acid active site</i> |
| XP_010543159.1                   | <i>Tarenaya hassleriana</i>      | <i>Serine proteases, subtilase family, aspartic acid active site</i> |
| Traes_5BL_3BA7EA9A3              | <i>Triticum aestivum</i>         | <i>Serine proteases, subtilase family, aspartic acid active site</i> |
| cassava4-1_025821m               | <i>Manihot esculenta</i>         | <i>Serine proteases, trypsin family, serine active site</i>          |
| KZV46422.1                       | <i>Dorcoceras hygrometricum</i>  | <i>Serine/Threonine protein kinases active-site signature</i>        |
| Gh_D11G0701                      | <i>Gossypium hirsutum</i>        | <i>Serine/Threonine protein kinases active-site signature</i>        |
| XP_010551540.1                   | <i>Tarenaya hassleriana</i>      | <i>Serine/threonine specific protein phosphatases signature</i>      |
| OMERI04G25580.2                  | <i>Oryza meridionalis</i>        | <i>Sigma-54 interaction domain ATP-binding region A signature</i>    |
| RrC3821_p1                       | <i>Raphanus raphanistrum</i>     | <i>Sigma-54 interaction domain ATP-binding region A signature</i>    |
| AUR62000898                      | <i>Chenopodium quinoa</i>        | <i>Signal peptidases I serine active site</i>                        |
| Cucsa.284890.1                   | <i>Cucumis sativus</i>           | <i>Signal peptidases I serine active site</i>                        |
| scaffold02306-augustus-gene-0.21 | <i>Castanea mollissima</i>       | <i>Signal peptidases I serine active site</i>                        |
| OB07G32110.1                     | <i>Oryza brachyanta</i>          | <i>Signal peptidases I signature 3</i>                               |
| GSBRNA2T00106219001              | <i>Brassica napus</i>            | <i>Signal peptidases I signature 3</i>                               |

|                           |                                  |                                                                                |
|---------------------------|----------------------------------|--------------------------------------------------------------------------------|
| OB07G32110.1              | <i>Oryza brachyantha</i>         | <i>Signal peptidases I signature 3</i>                                         |
| XP_013583708.1            | <i>Brassica oleracea</i>         | <i>Signal peptidases I signature 3</i>                                         |
| Tp57577_TGAC_v2_mRNA33521 | <i>Trifolium pratense</i>        | <i>Soybean trypsin inhibitor (Kunitz) protease inhibitors family signature</i> |
| Aqcoe3G142100.1.p         | <i>Aquilegiacoerulea</i>         | <i>SRP54-type proteins GTP-binding domain signature</i>                        |
| EcC047434.20              | <i>Eucalyptus camaldulensis</i>  | <i>Sugar transport proteins signature 2</i>                                    |
| Eucgr-I01940.1.p          | <i>Eucalyptus grandis</i>        | <i>Sugar transport proteins signature 2</i>                                    |
| KHN21163.1                | <i>Glycine soja</i>              | <i>Synaptobrevin signature</i>                                                 |
| TRAES3BF073600100CFD_t1   | <i>Triticum aestivum</i>         | <i>Syntaxin / epimorphin family signature</i>                                  |
| PH01002656G0020           | <i>Phyllostachys heterocycla</i> | <i>TonB-dependent receptor proteins signature 1</i>                            |
| AA11G00017                | <i>Aethionema arabicum</i>       | <i>TonB-dependent receptor proteins signature 1</i>                            |
| AA32G01100                | <i>Aethionema arabicum</i>       | <i>TonB-dependent receptor proteins signature 1</i>                            |
| PH01002656G0020           | <i>Phyllostachys heterocycla</i> | <i>TonB-dependent receptor proteins signature 1</i>                            |
| XP_010520901.1            | <i>Tarenaya hassleriana</i>      | <i>TonB-dependent receptor proteins signature 1</i>                            |
| XP_010539252.1            | <i>Tarenaya hassleriana</i>      | <i>TonB-dependent receptor proteins signature 1</i>                            |
| C.cajan_41044             | <i>Cajanus cajan</i>             | <i>TonB-dependent receptor proteins signature 1</i>                            |
| Zosma1g02650              | <i>Zostera marina</i>            | <i>Translationally controlled tumor protein (TCTP) domain signature 2</i>      |
| Spipo0G0093000            | <i>Spirodela polyrhiza</i>       | <i>Trp-Asp (WD) repeats signature</i>                                          |
| Tp4g25130                 | <i>Thellungiella parvula</i>     | <i>Trp-Asp (WD) repeats signature</i>                                          |
| 483400                    | <i>Arabidopsis lyrata</i>        | <i>Trp-Asp (WD) repeats signature</i>                                          |
| Bostr.25993s0479.1.p      | <i>Boechera stricta</i>          | <i>Trp-Asp (WD) repeats signature</i>                                          |
| GSBRNA2T00045062001       | <i>Brassica napus</i>            | <i>Trp-Asp (WD) repeats signature</i>                                          |
| GSBRNA2T00084755001       | <i>Brassica napus</i>            | <i>Trp-Asp (WD) repeats signature</i>                                          |
| XP_013634618.1            | <i>Brassica oleracea</i>         | <i>Trp-Asp (WD) repeats signature</i>                                          |
| XP_013634619.1            | <i>Brassica oleracea</i>         | <i>Trp-Asp (WD) repeats signature</i>                                          |
| .XP_013634620.1           | <i>Brassica oleracea</i>         | <i>Trp-Asp (WD) repeats signature</i>                                          |
| XP_009142151.1            | <i>Brassica rapa</i>             | <i>Trp-Asp (WD) repeats signature</i>                                          |
| XP_008221120.1            | <i>Prunus mume</i>               | <i>Trp-Asp (WD) repeats signature</i>                                          |
| KFK37142.1                | <i>Arabis alpina</i>             | <i>Trp-Asp (WD) repeats signature</i>                                          |

|                         |                                   |                                                                |
|-------------------------|-----------------------------------|----------------------------------------------------------------|
| Kalax-0139s0008.1.p     | <i>Kalanchoe marnieriana</i>      | <i>Tubulin subunits alpha, beta, and gamma signature</i>       |
| Kalax-0355s0005.1.p     | <i>Kalanchoe marnieriana</i>      | <i>Tubulin subunits alpha, beta, and gamma signature</i>       |
| XP_016502907.1          | <i>Nicotiana tabacum</i>          | <i>Tubulin-beta mRNA autoregulation signal</i>                 |
| Zmw_sc03169.1.g00010.1  | <i>Zoysia matrella</i>            | <i>Tubulin-beta mRNA autoregulation signal</i>                 |
| GSMUA_Achr7P09510_001   | <i>Musa acuminata</i>             | <i>Zinc carboxypeptidases, zinc-binding region 2 signature</i> |
| Pavir.Ab01115           | <i>Panicum virgatum</i>           | <i>Zinc carboxypeptidases, zinc-binding region 2 signature</i> |
| Pavir.J12496            | <i>Panicum virgatum</i>           | <i>Zinc carboxypeptidases, zinc-binding region 2 signature</i> |
| PDK_30s745071g005       | <i>Phoenix dactylifera</i>        | <i>Zinc carboxypeptidases, zinc-binding region 2 signature</i> |
| MLOC_75795.1            | <i>Hordeum vulgare</i>            | <i>Zinc carboxypeptidases, zinc-binding region 2 signature</i> |
| Pavir-1KG158700.1.p     | <i>Panicum virgatum</i>           | <i>Zinc carboxypeptidases, zinc-binding region 2 signature</i> |
| Pavir-1KG168100.1.p     | <i>Panicum virgatum</i>           | <i>Zinc carboxypeptidases, zinc-binding region 2 signature</i> |
| PDK_30s745071g005       | <i>Phoenix dactylifera</i>        | <i>Zinc carboxypeptidases, zinc-binding region 2 signature</i> |
| Traes_3AS_74E386CE7.1   | <i>Triticum aestivum</i>          | <i>Zinc carboxypeptidases, zinc-binding region 2 signature</i> |
| TRAES3BF096900070CFD_t1 | <i>Triticum aestivum</i>          | <i>Zinc carboxypeptidases, zinc-binding region 2 signature</i> |
| Do016529.1              | <i>Dichanthelium oligosanthes</i> | <i>Zinc finger BED-type profile</i>                            |
| Araip.9MG9F             | <i>Arachis ipaensis</i>           | <i>Zinc finger C2H2 type domain signature</i>                  |
| PDK_30s663981g010       | <i>Phoenix dactylifera</i>        | <i>Zinc-containing alcohol dehydrogenases signature</i>        |
| PDK_30s663981g010       | <i>Phoenix dactylifera</i>        | <i>Zinc-containing alcohol dehydrogenases signature</i>        |
| Araha.61839s0001.1.p    | <i>Arabidopsis halleri</i>        |                                                                |
| OB11G21460.1            | <i>Oryza brachyantha</i>          |                                                                |

---
