# Supplementary material for: Genomics, molecular and evolutionary perspective of NAC transcription factors
Source: PubMed Central journal article supplement (PMC7147800; doi:10.1371/journal.pone.0231425), 2020-04-10
Supplement: pone.0231425.s003.pdf [file pone.0231425.s003.pdf]

### Supplementary Table 3

NAC TFs showing their involvement in different pathways and biological process.

| Pathways of NAC TFs                                         | Gene Ontology identifier | False discovery rate |
|-------------------------------------------------------------|--------------------------|----------------------|
| Abscisic acid-activated signaling pathway                   | GO.0009738               | 0.042                |
| Aerenchyma formation                                        | GO.0010618               | 0.00901              |
| Aging                                                       | GO.0007568               | 8.89E-06             |
| Anatomical structure development                            | GO.0048856               | 7.77E-21             |
| Anatomical structure formation involved in morphogenesis    | GO.0048646               | 0.00169              |
| Anatomical structure morphogenesis                          | GO.0009653               | 1.23E-16             |
| Androecium development                                      | GO.0048466               | 0.0436               |
| Anthocyanin accumulation in tissues in response to UV light | GO.0043481               | 0.0239               |
| Anthocyanin-containing compound biosynthetic process        | GO.0009718               | 0.00442              |
| Aromatic compound biosynthetic process                      | GO.0019438               | 1.44E-35             |
| Asymmetric cell division                                    | GO.0008356               | 0.0265               |
| Auxin influx                                                | GO.0060919               | 1.46E-06             |
| Auxin polar transport                                       | GO.0009926               | 0.0357               |
| Auxin transport                                             | GO.0060918               | 0.0128               |
| Auxin-activated signaling pathway                           | GO.0009734               | 0.00338              |
| Biological regulation                                       | GO.0065007               | 7.85E-33             |
| Biological_process                                          | GO.0008150               | 0.000629             |
| Biosynthetic process                                        | GO.0009058               | 1.44E-16             |
| Cell communication                                          | GO.0007154               | 1.07E-11             |
| Cell development                                            | GO.0048468               | 2.09E-09             |
| Cell differentiation                                        | GO.0030154               | 1.97E-12             |
| Cell fate commitment                                        | GO.0045165               | 0.015                |
| Cell growth                                                 | GO.0016049               | 0.000551             |
| Cell morphogenesis                                          | GO.0000902               | 0.000244             |
| Cell morphogenesis involved in differentiation              | GO.0000904               | 0.000137             |
| Cell tip growth                                             | GO.0009932               | 0.0014               |
| Cell wall organization                                      | GO.0071555               | 0.00345              |
| Cell wall organization or biogenesis                        | GO.0071554               | 8.29E-06             |
| Cellular aromatic compound metabolic process                | GO.0006725               | 1.46E-22             |
| Cellular biosynthetic process                               | GO.0044249               | 2.58E-18             |
| Cellular component organization                             | GO.0016043               | 0.021                |
| Cellular component organization or biogenesis               | GO.0071840               | 0.000535             |
| Cellular developmental process                              | GO.0048869               | 1.19E-10             |
| Cellular heat acclimation                                   | GO.0070370               | 0.00717              |
| Cellular macromolecule biosynthetic process                 | GO.0034645               | 9.31E-34             |
| Cellular macromolecule metabolic process                    | GO.0044260               | 4.50E-16             |
| Cellular metabolic process                                  | GO.0044237               | 5.22E-06             |
| Cellular nitrogen compound biosynthetic process             | GO.0044271               | 7.48E-28             |
| Cellular nitrogen compound metabolic process                | GO.0034641               | 5.23E-18             |
| Cellular process                                            | GO.0009987               | 1.86E-07             |
| Cellular response to acid chemical                          | GO.0071229               | 2.33E-07             |
| Cellular response to auxin stimulus                         | GO.0071365               | 0.00188              |
| Cellular response to chemical stimulus                      | GO.0070887               | 9.87E-07             |
| Cellular response to gibberellin stimulus                   | GO.0071370               | 3.53E-06             |
| Cellular response to hormone stimulus                       | GO.0032870               | 2.11E-06             |
| Cellular response to jasmonic acid stimulus                 | GO.0071395               | 0.000857             |

|                                                             |            |          |
|-------------------------------------------------------------|------------|----------|
| Cellular response to lipid                                  | GO.0071396 | 2.97E-05 |
| Cellular response to organic substance                      | GO.0071310 | 2.15E-07 |
| Cellular response to oxygen-containing compound             | GO.1901701 | 2.66E-06 |
| Cellular response to stimulus                               | GO.0051716 | 3.41E-14 |
| Cellular response to stress                                 | GO.0033554 | 3.01E-07 |
| Cellular response to sulfur starvation                      | GO.0010438 | 0.00231  |
| Defense response                                            | GO.0006952 | 1.78E-13 |
| Defense response to bacterium                               | GO.0042742 | 0.00012  |
| Defense response to bacterium, incompatible interaction     | GO.0009816 | 0.00141  |
| Defense response to fungus, incompatible interaction        | GO.0009817 | 0.0192   |
| Defense response to other organism                          | GO.0098542 | 0.000304 |
| Defense response, incompatible interaction                  | GO.0009814 | 3.74E-06 |
| Detection of bacterium                                      | GO.0016045 | 0.0239   |
| Developmental cell growth                                   | GO.0048588 | 0.00412  |
| Developmental growth                                        | GO.0048589 | 0.00171  |
| Developmental growth involved in morphogenesis              | GO.0060560 | 0.00161  |
| Developmental maturation                                    | GO.0021700 | 6.83E-06 |
| Developmental process                                       | GO.0032502 | 5.95E-23 |
| Developmental process involved in reproduction              | GO.0003006 | 5.00E-05 |
| Embryo development ending in seed dormancy                  | GO.0009793 | 0.00221  |
| Embryonic meristem development                              | GO.0048508 | 2.69E-08 |
| Embryonic meristem initiation                               | GO.0090421 | 3.54E-10 |
| ERAD pathway                                                | GO.0036503 | 0.0138   |
| ER-associated ubiquitin-dependent protein catabolic process | GO.0030433 | 0.0138   |
| Floral organ development                                    | GO.0048437 | 0.00856  |
| Floral whorl development                                    | GO.0048438 | 0.00115  |
| Flower development                                          | GO.0009908 | 0.0245   |
| Formation of organ boundary                                 | GO.0010160 | 0.000179 |
| Fruit development                                           | GO.0010154 | 0.000277 |
| Gene expression                                             | GO.0010467 | 1.59E-28 |
| Gibberellic acid mediated signaling pathway                 | GO.0009740 | 2.10E-06 |
| Gravitropism                                                | GO.0009630 | 0.0182   |
| Heat acclimation                                            | GO.0010286 | 0.015    |
| Heterocycle metabolic process                               | GO.0046483 | 1.46E-22 |
| Hormone-mediated signaling pathway                          | GO.0009755 | 1.34E-06 |
| Immune system process                                       | GO.0002376 | 7.48E-08 |
| Indole glucosinolate biosynthetic process                   | GO.0009759 | 0.0239   |
| Innate immune response                                      | GO.0045087 | 5.60E-08 |
| Integument development                                      | GO.0080060 | 0.00717  |
| Intercellular transport                                     | GO.0010496 | 0.0427   |
| Jasmonic acid mediated signaling pathway                    | GO.0009867 | 0.000531 |
| Lateral root development                                    | GO.0048527 | 6.03E-06 |
| Lateral root morphogenesis                                  | GO.0010102 | 0.00115  |
| Leaf development                                            | GO.0048366 | 4.16E-05 |
| Leaf senescence                                             | GO.0010150 | 4.15E-06 |
| Macromolecule metabolic process                             | GO.0043170 | 3.11E-13 |
| Meristem development                                        | GO.0048507 | 5.08E-06 |
| Meristem initiation                                         | GO.0010014 | 7.99E-10 |
| Meristem maintenance                                        | GO.0010073 | 0.0474   |
| Meristem structural organization                            | GO.0009933 | 9.68E-08 |
| Metabolic process                                           | GO.0008152 | 0.00882  |

|                                                                         |            |          |
|-------------------------------------------------------------------------|------------|----------|
| Multicellular organismal development                                    | GO.0007275 | 3.66E-20 |
| Multicellular organismal process                                        | GO.0032501 | 2.78E-21 |
| Multi-organism process                                                  | GO.0051704 | 2.29E-07 |
| Negative regulation of biological process                               | GO.0048519 | 2.74E-08 |
| Negative regulation of cell communication                               | GO.0010648 | 2.40E-05 |
| Negative regulation of cell differentiation                             | GO.0045596 | 0.00254  |
| Negative regulation of cellular biosynthetic process                    | GO.0031327 | 8.59E-05 |
| Negative regulation of cellular macromolecule biosynthetic process      | GO.2000113 | 0.00017  |
| Negative regulation of cellular metabolic process                       | GO.0031324 | 0.000298 |
| Negative regulation of cellular process                                 | GO.0048523 | 9.51E-10 |
| Negative regulation of developmental process                            | GO.0051093 | 0.000857 |
| Negative regulation of gene expression                                  | GO.0010629 | 0.00156  |
| Negative regulation of gibberellic acid mediated signaling pathway      | GO.0009938 | 0.0107   |
| Negative regulation of macromolecule metabolic process                  | GO.0010605 | 0.00221  |
| Negative regulation of metabolic process                                | GO.0009892 | 0.00221  |
| Negative regulation of multicellular organismal process                 | GO.0051241 | 0.00882  |
| Negative regulation of nitrogen compound metabolic process              | GO.0051172 | 2.00E-05 |
| Negative regulation of nucleobase-containing compound metabolic process | GO.0045934 | 0.000157 |
| Negative regulation of response to stimulus                             | GO.0048585 | 0.00345  |
| Negative regulation of signal transduction                              | GO.0009968 | 0.00373  |
| Negative regulation of signaling                                        | GO.0023057 | 2.40E-05 |
| Negative regulation of transcription, DNA-templated                     | GO.0045892 | 0.000231 |
| Negative regulation of trichome patterning                              | GO.1900033 | 0.000278 |
| Nitrogen compound metabolic process                                     | GO.0006807 | 3.32E-15 |
| Nucleic acid metabolic process                                          | GO.0090304 | 4.93E-31 |
| Nucleobase-containing compound metabolic process                        | GO.0006139 | 1.92E-25 |
| Organ development                                                       | GO.0048513 | 1.76E-23 |
| Organ formation                                                         | GO.0048645 | 0.000144 |
| Organ morphogenesis                                                     | GO.0009887 | 0.00116  |
| Organic cyclic compound biosynthetic process                            | GO.1901362 | 1.31E-33 |
| Organic cyclic compound metabolic process                               | GO.1901360 | 1.51E-21 |
| Organic substance biosynthetic process                                  | GO.1901576 | 8.42E-18 |
| Organic substance metabolic process                                     | GO.0071704 | 0.00021  |
| Pattern specification process                                           | GO.0007389 | 4.24E-08 |
| Phyllome development                                                    | GO.0048827 | 1.12E-08 |
| Plant epidermis development                                             | GO.0090558 | 1.76E-07 |
| Plant epidermis morphogenesis                                           | GO.0090626 | 0.0177   |
| Plant-type cell wall biogenesis                                         | GO.0009832 | 1.71E-06 |
| Plant-type hypersensitive response                                      | GO.0009626 | 0.00901  |
| Plant-type secondary cell wall biogenesis                               | GO.0009834 | 2.75E-09 |
| Positive gravitropism                                                   | GO.0009958 | 0.0312   |
| Positive regulation of biological process                               | GO.0048518 | 2.40E-17 |
| Positive regulation of cell death                                       | GO.0010942 | 2.86E-05 |
| Positive regulation of cellular biosynthetic process                    | GO.0031328 | 2.32E-17 |
| Positive regulation of cellular component biogenesis                    | GO.0044089 | 0.000106 |
| Positive regulation of cellular metabolic process                       | GO.0031325 | 2.38E-17 |
| Positive regulation of cellular process                                 | GO.0048522 | 8.92E-23 |
| Positive regulation of defense response                                 | GO.0031349 | 0.0257   |

|                                                                                    |            |          |
|------------------------------------------------------------------------------------|------------|----------|
| Positive regulation of defense response to bacterium                               | GO.1900426 | 0.0151   |
| Positive regulation of leaf senescence                                             | GO.1900057 | 0.00439  |
| Positive regulation of macromolecule metabolic process                             | GO.0010604 | 4.58E-16 |
| Positive regulation of metabolic process                                           | GO.0009893 | 6.63E-13 |
| Positive regulation of nitrogen compound metabolic process                         | GO.0051173 | 3.21E-18 |
| Positive regulation of nucleobase-containing compound metabolic process            | GO.0045935 | 2.35E-18 |
| Positive regulation of programmed cell death                                       | GO.0043068 | 0.0265   |
| Positive regulation of response to stimulus                                        | GO.0048584 | 0.00169  |
| Positive regulation of secondary cell wall biogenesis                              | GO.1901348 | 7.35E-09 |
| Positive regulation of sequence-specific DNA binding transcription factor activity | GO.0051091 | 8.89E-06 |
| Positive regulation of signal transduction                                         | GO.0009967 | 0.042    |
| Positive regulation of transcription, DNA-templated                                | GO.0045893 | 1.23E-18 |
| Post-embryonic development                                                         | GO.0009791 | 0.000358 |
| Post-embryonic morphogenesis                                                       | GO.0009886 | 0.00169  |
| Post-embryonic organ development                                                   | GO.0048569 | 6.79E-07 |
| Primary metabolic process                                                          | GO.0044238 | 2.86E-05 |
| Primary shoot apical meristem specification                                        | GO.0010072 | 1.02E-08 |
| Programmed cell death                                                              | GO.0012501 | 3.38E-06 |
| Regionalization                                                                    | GO.0003002 | 1.11E-07 |
| Regulation of abscisic acid-activated signaling pathway                            | GO.0009787 | 0.00901  |
| Regulation of actin filament depolymerization                                      | GO.0030834 | 0.0427   |
| Regulation of biological process                                                   | GO.0050789 | 2.14E-40 |
| Regulation of cell communication                                                   | GO.0010646 | 9.30E-09 |
| Regulation of cell death                                                           | GO.0010941 | 0.0069   |
| Regulation of cell differentiation                                                 | GO.0045595 | 1.12E-06 |
| Regulation of cell fate commitment                                                 | GO.0010453 | 0.000108 |
| Regulation of cell wall organization or biogenesis                                 | GO.1903338 | 1.87E-10 |
| Regulation of cellular biosynthetic process                                        | GO.0031326 | 1.89E-44 |
| Regulation of cellular component biogenesis                                        | GO.0044087 | 8.91E-06 |
| Regulation of cellular macromolecule biosynthetic process                          | GO.2000112 | 8.08E-45 |
| Regulation of cellular metabolic process                                           | GO.0031323 | 1.84E-44 |
| Regulation of cellular process                                                     | GO.0050794 | 1.00E-44 |
| Regulation of defense response                                                     | GO.0031347 | 0.000101 |
| Regulation of defense response to insect                                           | GO.2000068 | 0.0239   |
| Regulation of developmental process                                                | GO.0050793 | 3.37E-06 |
| Regulation of embryonic development                                                | GO.0045995 | 0.0265   |
| Regulation of epidermal cell differentiation                                       | GO.0045604 | 0.0432   |
| Regulation of flavonoid biosynthetic process                                       | GO.0009962 | 0.00442  |
| Regulation of gene expression                                                      | GO.0010468 | 1.45E-44 |
| Regulation of gibberellic acid mediated signaling pathway                          | GO.0009937 | 0.00579  |
| Regulation of glucosinolate biosynthetic process                                   | GO.0010439 | 0.00102  |
| Regulation of leaf development                                                     | GO.2000024 | 0.000146 |
| Regulation of leaf senescence                                                      | GO.1900055 | 0.00442  |
| Regulation of macromolecule biosynthetic process                                   | GO.0010556 | 4.27E-44 |
| Regulation of macromolecule metabolic process                                      | GO.0060255 | 5.52E-43 |
| Regulation of metabolic process                                                    | GO.0019222 | 5.74E-41 |
| Regulation of multicellular organismal development                                 | GO.2000026 | 6.67E-06 |
| Regulation of multicellular organismal process                                     | GO.0051239 | 6.89E-06 |
| Regulation of multi-organism process                                               | GO.0043900 | 0.0177   |

|                                                                           |            |          |
|---------------------------------------------------------------------------|------------|----------|
| Regulation of nitrogen compound metabolic process                         | GO.0051171 | 7.17E-46 |
| Regulation of nucleic acid-templated transcription                        | GO.1903506 | 3.26E-46 |
| Regulation of nucleobase-containing compound metabolic process            | GO.0019219 | 3.26E-46 |
| Regulation of organ morphogenesis                                         | GO.2000027 | 0.00717  |
| Regulation of primary metabolic process                                   | GO.0080090 | 9.66E-43 |
| Regulation of reactive oxygen species metabolic process                   | GO.2000377 | 0.0312   |
| Regulation of response to biotic stimulus                                 | GO.0002831 | 0.00626  |
| Regulation of response to external stimulus                               | GO.0032101 | 0.0109   |
| Regulation of response to stimulus                                        | GO.0048583 | 1.43E-09 |
| Regulation of response to stress                                          | GO.0080134 | 9.34E-05 |
| Regulation of salicylic acid biosynthetic process                         | GO.0080142 | 0.0432   |
| Regulation of salicylic acid metabolic process                            | GO.0010337 | 0.0265   |
| Regulation of secondary cell wall biogenesis                              | GO.2000652 | 6.82E-10 |
| Regulation of secondary metabolite biosynthetic process                   | GO.1900376 | 0.000119 |
| Regulation of sequence-specific DNA binding transcription factor activity | GO.0051090 | 4.22E-06 |
| Regulation of shoot system development                                    | GO.0048831 | 0.00282  |
| Regulation of signal transduction                                         | GO.0009966 | 6.42E-07 |
| Regulation of signaling                                                   | GO.0023051 | 6.28E-09 |
| Regulation of sulfur metabolic process                                    | GO.0042762 | 0.000179 |
| Regulation of transcription, DNA-templated                                | GO.0006355 | 9.79E-47 |
| Regulation of trichome morphogenesis                                      | GO.2000039 | 0.0239   |
| Reproductive process                                                      | GO.0022414 | 4.46E-05 |
| Reproductive shoot system development                                     | GO.0090567 | 0.0139   |
| Reproductive structure development                                        | GO.0048608 | 0.000238 |
| Reproductive system development                                           | GO.0061458 | 0.000238 |
| Response to abiotic stimulus                                              | GO.0009628 | 1.56E-10 |
| Response to abscisic acid                                                 | GO.0009737 | 1.03E-05 |
| Response to acid chemical                                                 | GO.0001101 | 1.10E-22 |
| Response to auxin                                                         | GO.0009733 | 1.38E-07 |
| Response to bacterium                                                     | GO.0009617 | 0.000157 |
| Response to chemical                                                      | GO.0042221 | 3.74E-17 |
| Response to chitin                                                        | GO.0010200 | 9.07E-05 |
| Response to endogenous stimulus                                           | GO.0009719 | 1.23E-16 |
| Response to endoplasmic reticulum stress                                  | GO.0034976 | 0.000173 |
| Response to ethylene                                                      | GO.0009723 | 0.00538  |
| Response to external stimulus                                             | GO.0009605 | 7.93E-07 |
| Response to fungus                                                        | GO.0009620 | 0.0254   |
| Response to gibberellin                                                   | GO.0009739 | 1.56E-15 |
| Response to hormone                                                       | GO.0009725 | 7.57E-14 |
| Response to hydrogen peroxide                                             | GO.0042542 | 0.022    |
| Response to inorganic substance                                           | GO.0010035 | 0.00168  |
| Response to insect                                                        | GO.0009625 | 0.000146 |
| Response to jasmonic acid                                                 | GO.0009753 | 1.16E-17 |
| Response to lipid                                                         | GO.0033993 | 2.73E-13 |
| Response to nitrogen compound                                             | GO.1901698 | 0.0184   |
| Response to organic cyclic compound                                       | GO.0014070 | 4.11E-12 |
| Response to organic substance                                             | GO.0010033 | 1.22E-20 |
| Response to osmotic stress                                                | GO.0006970 | 1.12E-06 |
| Response to other organism                                                | GO.0051707 | 1.46E-06 |

|                                          |            |          |
|------------------------------------------|------------|----------|
| Response to oxygen-containing compound   | GO.1901700 | 1.92E-22 |
| Response to radiation                    | GO.0009314 | 0.0455   |
| Response to salicylic acid               | GO.0009751 | 3.96E-16 |
| Response to salt stress                  | GO.0009651 | 1.39E-06 |
| Response to stimulus                     | GO.0050896 | 1.23E-16 |
| Response to stress                       | GO.0006950 | 1.16E-17 |
| Response to unfolded protein             | GO.0006986 | 0.0151   |
| Response to UV                           | GO.0009411 | 0.0334   |
| Response to water deprivation            | GO.0009414 | 0.000207 |
| Response to wounding                     | GO.0009611 | 0.000108 |
| RNA metabolic process                    | GO.0016070 | 4.00E-34 |
| Root cap development                     | GO.0048829 | 1.88E-09 |
| Root development                         | GO.0048364 | 1.88E-15 |
| Root epidermal cell differentiation      | GO.0010053 | 1.15E-05 |
| Root hair cell development               | GO.0080147 | 0.000551 |
| Root hair cell differentiation           | GO.0048765 | 1.20E-05 |
| Root hair cell tip growth                | GO.0048768 | 0.00741  |
| Root hair elongation                     | GO.0048767 | 0.0048   |
| Root morphogenesis                       | GO.0010015 | 1.05E-09 |
| Root system development                  | GO.0022622 | 2.08E-15 |
| Seed development                         | GO.0048316 | 0.000723 |
| Shoot system development                 | GO.0048367 | 1.02E-08 |
| Shoot system morphogenesis               | GO.0010016 | 0.000919 |
| Sieve element differentiation            | GO.0090603 | 0.00901  |
| Sieve element enucleation                | GO.0090602 | 0.00901  |
| Signal transduction                      | GO.0007165 | 1.61E-10 |
| Single organism reproductive process     | GO.0044702 | 7.43E-06 |
| Single organism signaling                | GO.0044700 | 3.53E-11 |
| Single-organism cellular process         | GO.0044763 | 0.0279   |
| Single-organism developmental process    | GO.0044767 | 4.17E-23 |
| Single-organism process                  | GO.0044699 | 0.000756 |
| Specification of symmetry                | GO.0009799 | 0.0432   |
| Stamen development                       | GO.0048443 | 0.0436   |
| Stamen filament development              | GO.0080086 | 0.0107   |
| Stem cell differentiation                | GO.0048863 | 0.0432   |
| System development                       | GO.0048731 | 4.40E-16 |
| Tissue development                       | GO.0009888 | 2.58E-18 |
| Transcription, DNA-templated             | GO.0006351 | 8.08E-45 |
| Transport of virus in host, cell to cell | GO.0046740 | 0.00901  |
| Trichoblast differentiation              | GO.0010054 | 1.85E-05 |
| Trichome differentiation                 | GO.0010026 | 5.88E-05 |
| Trichome morphogenesis                   | GO.0010090 | 0.0109   |
| Trichome patterning                      | GO.0048629 | 0.000278 |
| Unidimensional cell growth               | GO.0009826 | 0.00531  |
| Xylem development                        | GO.0010089 | 4.16E-06 |
| Xylem vessel member cell differentiation | GO.0048759 | 1.43E-09 |
